# Supplementary material
Source: PubMed Central journal article supplement (PMC3182100)
Supplement: NIHMS325965-supplement-1.pdf [file NIHMS325965-supplement-1.pdf]

# Supporting Information

for

## **Synthetic Strategy of Nonreducing Iterative Polyketide Synthases and the Origin of the Classical “Starter Unit Effect”**

Jason M. Crawford, Anna L. Vagstad, Karen P. Whitworth  
Kenneth C. Ehrlich, and Craig A. Townsend\*

1. Strains and Culture Conditions
2. Cloning and Mutagenesis
3. Expression and Purification of SAT monodomains
4. Expression and Purification of PKS1 SAT-KS-MAT tridomain
5. Kinetic Assay of SAT transfer
6. CD Analysis of PKS1 SAT and PKS1 SAT C119A
7. Radiochemical Assay of SAT transfer
8. Synthon Synthesis
9. PKS4 Revised gDNA Sequence

**Strains and Culture Conditions.** *C. orbiculare* NRRL 28842 (*pks1*) was obtained from Dr. Kerry O'Donnell at the Northern Center for Agricultural Utilization Research (NCAUR), Peoria, IL. Cultures showing dark brown mycelia on potato dextrose (PD) agar plates were harvested in Triton X-100 (0.1%) and grown overnight with shaking at 30 °C in PD liquid medium. Mycelia were collected by filtration and ground in liquid nitrogen to a fine powder. DNA was prepared from an aliquot of the ground mycelia using the DNeasy method (Invitrogen). The gDNA PCR templates for *A. nidulans* RLMH67 (*wA*), *C. nicotianae* ATCC18366 (*ctb1*), and the imperfect form of *G. fujikuroi*, *Fusarium fujikuroi* M6884 (+) (*pks4*), were gifts from Dr. Nancy Keller, University of Wisconsin Madison, Dr. Margo Daub, North Carolina State University, and Dr. Robert Proctor, NCAUR, respectively.

**Cloning and Mutagenesis.** The predicted protein sequence data (NCBI) coded by exons 1 and 2 in *wA* (Q03149), *pks1* (BAA18956), *ctb1* (AAT69682), and *pks4* (CAB92399) were codon optimized for *E. coli*. The synthons (synthetic gene fragments) with a 5' NdeI site for cloning were assembled from standard 40-mer oligonucleotides using polymerase cycling assembly (PCA) followed by PCR amplification. The remaining portion of the SAT domains within exon 3 were amplified from the gDNA templates including an engineered 5' overlap to the codon optimized fragment and a 3' NotI site. Primer pairs include WA-ex3-5 / SAT-WA-3, *wA*; PKS1-ex3-5 / SAT-PKS1-3, *pks1*; CTB1-ex3-5 / SAT-CTB1-3, *ctb1*; and PKS4-ex3-5 / SAT-PKS4-3, *pks4*. The codon-optimized fragment was fused to the gDNA fragment by overlap extension PCR and amplified using the end primers for *wA*, *pks1*, and *ctb1*. The full-length PCR products were digested with NdeI and NotI and inserted into the corresponding sites in pET24a (Novagen) generating pEWA-SAT, pEPKS1-SAT, and pECTB1-SAT. The PKS4 overlapping region contained a unique EcoRI site for ligation of the two fragments. The exon 3 fragment was

inserted into the EcoRI/NotI sites in pET24a yielding pEPKS4-exon3. The synthon was subsequently digested with NdeI and EcoRI and inserted into the corresponding sites in pEPKS4-exon3 giving rise to the expression construct pEPKS4-SAT. All translated SAT domain sequences were identical to their corresponding protein accession numbers. As a control, the active site Cys119 codon within the PKS1 SAT domain was mutated to Ala using overlap extension PCR.

The expected GXCXG motif within PKS4 (CAB92399) was encoded within the formerly proposed intron, and expression of this SAT resulted in no soluble protein. Therefore, a gDNA fragment encompassing this region was amplified with oligonucleotides PKS4-ex1-5 and PKS4-ex2-3 for sequence verification. Products from two separate PCR reactions were cloned into pCR-ZeroBlunt (Invitrogen) and sequenced. A deletion mutation was discovered in the available sequence (CAB92399). Hidden Markov Model (HMM)-based gene structure prediction modeled on the similar fungus *Fusarium graminearum* yielded an alternative splicing pattern that translated through the GXCXG motif (FGENESH, [www.softberry.com](http://www.softberry.com)). The incorrect synthon sequence within the expression construct, pEPKS4-SAT, was repaired using both gene synthesis and overlap extension PCR to generate the revised expression construct, pEPKS4-SATn.

The SAT-KS-MAT tri-domain from PKS1 was constructed similarly to the SAT domain. The exon 3 fragment was amplified from the gDNA using PKS1-ex3-5 and NKA-PKS1-3 (NotI) and subsequently fused to the codon-optimized fragment. Insertion into pET24a generated pEPKS1-NKA. Like the SAT monodomain control, the active site Cys119 codon within the SAT domain was mutated to Ala.

| primer     | sequence 5'-3'                                          |
|------------|---------------------------------------------------------|
| WA-ex3-5   | GATAAATTTACCCGGCGTAACGTTATCCCTCCTTCGTCTCGGCC            |
| SAT-WA-3   | GTAAGCGGCCGC-TTCAGCCCTGCCTGTCTGGTTG                     |
| PKS1-ex3-5 | GCGAACTTTCATGAATCGAATTACATCTCCGTCGCCAGCCAAG             |
| SAT-PKS1-3 | GTAAGCGGCCGC-GCCACTGGAACCGTGGTTTCC                      |
| CTB1-ex3-5 | GAACAGGCGCTTGCATCCGTGTCCGTTCAT                          |
| SAT-CTB1-3 | GTAA-GCGGCCGCTGCCATCGGCTGCTGTTC                         |
| PKS4-ex3-5 | CTGAAAGAATTCTCAAAGGAAAAA<br>AATCTTACATACAGTTCGCGTCCCTAC |
| SAT-PKS4-3 | GTAAGCGGCCGC-ATCGCCAGGAGCAAGATTGGG                      |
| PKS4-ex1-5 | CATATGGCGTCCTCAGCAGATGTGT                               |
| PKS4-ex2-3 | CTGATGTAGGGACGCGAACTGTATGT                              |
| NKA-PKS1-3 | GTAAGCGGCCGCTTTGGGTCTGGCAGGCTCGAT                       |

**Expression and Purification of SAT monodomains.** BL21(DE3) *E. coli* cells (Novagen) harboring pEWA-SAT, pEPKS1-SAT, pECTB1-SAT, or pEPKS4-SATn were grown to  $OD_{600} = 0.6$  at 30 °C in 2×YT medium (200 mL) supplemented with kanamycin (25 µg/mL). The cultures were induced with IPTG (1 mM) and the temperature was lowered to 20 °C for a 16 hour expression. The cells were harvested at  $4080 \times g$  for 20 min and resuspended in resuspension buffer (5 mL, 50 mM potassium phosphate pH 7.6, 10% glycerol, 300 mM NaCl, 10 mM imidazole, and 1 mg/mL lysozyme). Cells were incubated on ice for 30 min, disrupted by sonication, and cleared by centrifugation for 30 min at  $27000 \times g$ . Protein was bound to nickel-nitrilotriacetic acid resin (Qiagen) and eluted with an imidazole step-gradient according to the manufacturer's instructions. The purified protein was dialyzed against 100 mM potassium phosphate pH 7.0 for assay, and enzyme concentrations were determined with the Bradford assay in triplicate using bovine albumin as a standard.

**Expression and Purification of PKS1 SAT-KS-MAT tridomain.** The SAT-KS-MAT tridomain was expressed in Rosetta2(DE3). The cells were grown to  $OD_{600} = 1.0$  at 30 °C in 2×YT (1 L) supplemented with both kanamycin (25 µg/mL) and chloramphenicol (25 µg/mL).

The cells were induced with IPTG (1 mM) and grown for 16 additional hours at 20 °C.

Harvested cells were resuspended in resuspension buffer (20 mL) including pepstatin A (1 mg/mL) and leupeptin (0.5 mg/mL) and the protein was purified similarly.

**Kinetic Assay of SAT Transfer.** Enzyme (0.5  $\mu$ M) was reacted with acyl-CoAs (1 mM) and pantetheine (2.5 mM) at 28.0 °C in 100 mM potassium phosphate, pH 7.0, so that transfer could be followed chromatographically. Aliquots (100  $\mu$ L) at 2,4,6, and 8 min were quenched in 8M urea (100  $\mu$ L), frozen in liquid nitrogen, and stored at -80 °C. Quenched reactions (200  $\mu$ L) were individually thawed, diluted with mobile phase (300  $\mu$ L), and filtered. Part of the filtered sample (200  $\mu$ L) was injected onto a Luna Phenyl-Hexyl 100-Å, 5- $\mu$ m, 4.6-  $\times$  250-mm column (Phenomenex), and CoA and acyl-CoAs (258 nm absorbance) and pantetheine and acyl-pantetheines (232 nm) were eluted with an acetonitrile gradient.

**CD Analysis of PKS1 SAT and PKS1 SAT C119A.** The monodomains were purified as above and their CD spectra (JASCO J-710) were obtained as shown below.

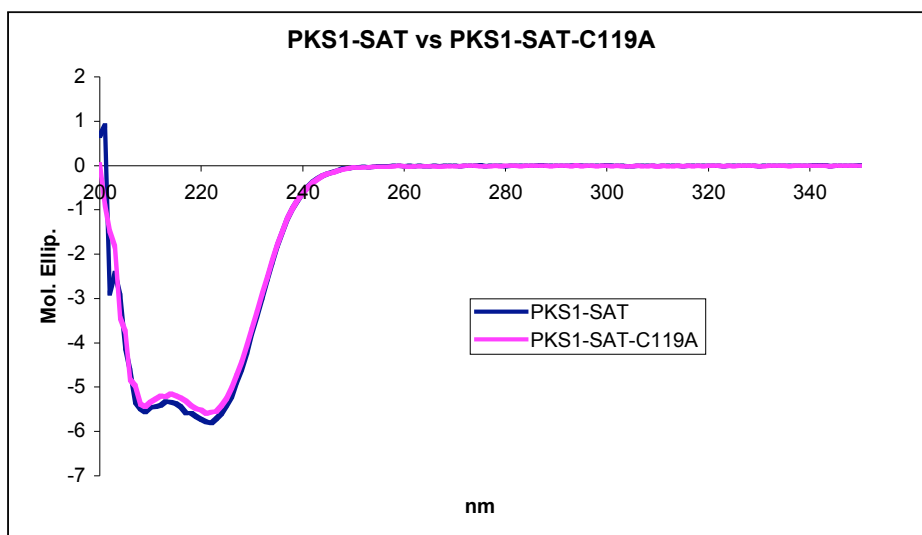

**Supporting Figure 1. CD analysis of PKS1 SAT domains.**

| Method<br>t(min)       | A    | B    |
|------------------------|------|------|
| acetyl/malonyl         |      |      |
| 5                      | 0    | 100  |
| 15                     | 5    | 95   |
| 19                     | 55   | 45   |
| 23                     | 70   | 30   |
| 27                     |      | 100  |
| propionyl/<br>butanoyl |      |      |
| 5                      |      | 100  |
| 7                      | 19   | 81   |
| 9                      | 19   | 81   |
| 14                     | 29.5 | 70.5 |
| 15                     | 35.2 | 64.8 |
| 20                     | 75   | 25   |
| 25                     |      | 100  |
| hexanoyl               |      |      |
| 5                      |      | 100  |
| 7                      | 23.8 | 76.2 |
| 9                      | 23.8 | 76.2 |
| 15                     | 40.8 | 59.2 |
| 17                     | 76   | 24   |
| 22                     | 65   | 35   |
| 28                     |      | 100  |

**HPLC methods.** Samples saved for HPLC analysis were examined using a Luna Phenyl-Hexyl 100Å, 5µm, 4.6 × 250 mm column (Phenomenex, Torrance, CA) as follows. In all cases CoA was detected under initially isocratic conditions, (Solvent A: 5% acetonitrile and 25 mM KH<sub>2</sub>PO<sub>4</sub>, pH = 5.4 w/NaOH; 50 °C, 1.5 mL/min for 5 min) and then gradient elution with Solvent B (acetonitrile, 50 °C) was varied depending on the substrates and products to be quantified.

| HPLC method | Compound       | Retention Time |
|-------------|----------------|----------------|
| malonyl     | pantetheine    | 14.5           |
|             | malonyl-CoA    | 2.9 min        |
|             | malonyl-pant   | 5.7 min        |
| acetyl      | pantetheine    | 14.4 min       |
|             | acetyl-CoA     | 5.9 min        |
|             | acetyl-pant    | 19.1 min       |
| propionyl   | pantetheine    | 9.5 min        |
|             | propionyl-CoA  | 9.0 min        |
|             | propionyl-pant | 11.7 min       |
| butanoyl    | pantetheine    | 9.5 min        |
|             | butanoyl-CoA   | 9.4 min        |
|             | butanoyl-pant  | 14 min         |
| hexanoyl    | pantetheine    | 9.3 min        |
|             | hex-CoA        | 9.8 min        |
|             | hex-pant       | 15.9 min       |
| All methods | CoA            | 3.2 min        |

## Radiochemical Assay of SAT Transfer

The SAT monodomains (10  $\mu$ M) from WA, PKS1, CTB1, and PKS4 in 100 mM potassium phosphate buffer (pH 7.0) in the presence of 200  $\mu$ M [ $1\text{-}^{14}\text{C}$ ]acetyl-CoA (54 mCi/mmol, Sigma-Aldrich, St. Louis, MO), with or without PksA ACP (10  $\mu$ M), were reacted at 25  $^{\circ}\text{C}$  for 5 min. The reactions were quenched with 5  $\times$  SDS gel loading buffer and separated over a 12% SDS-PAGE gel. The gels were dried between cellophane sheets and exposed to BioMax XAR film (Eastman, Kodak).

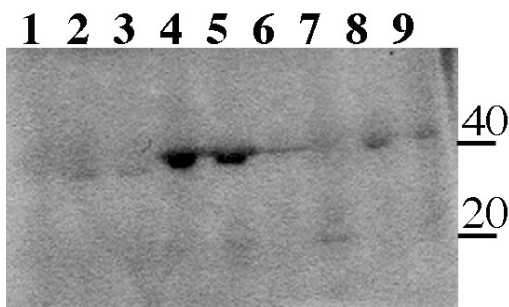

**Supporting Figure 2. Radioactive transacylase experiments.** The SAT and PksA *holo*-ACP combinations include: **1.** ACP component **2.** WA SAT **3.** WA SAT + ACP **4.** PKS1 SAT **5.** PKS1 SAT + ACP **6.** CTB1 SAT **7.** CTB1 SAT + ACP **8.** PKS4 SAT **9.** PKS4 SAT + ACP. All lanes including a SAT domain (~40 kDa) showed covalent loading of the acetyl group. Signals for the non-cognate ACP (~20 kDa) loading were faintly apparent, possibly due to hydrolysis during the analysis procedure, leading to the reduced intensity. Nevertheless, the PksA ACP was faintly labeled in all lanes including a SAT domain.

## Synthon synthesis

**PCA:** Standard desalted oligonucleotides were dissolved as 200  $\mu$ M stocks in EB buffer (Qiagen). An equal volume of each oligo was added together for a master mix solution. PCA was carried out in 50  $\mu$ L reactions: oligos (2  $\mu$ M each), cloned Pfu DNA polymerase buffer (Stratagene), dNTPs (0.2 mM each), and cloned Pfu DNA polymerase (0.5  $\mu$ L, Stratagene). PCA cycle: denaturation, 94  $^{\circ}\text{C}$  (5 min), 1 cycle; extension, 94  $^{\circ}\text{C}$  (30 s), 55  $^{\circ}\text{C}$  (30 s), 72  $^{\circ}\text{C}$  (2 min), 25 cycles; clean up, 72  $^{\circ}\text{C}$  (10 min).

**PCR:** The PCA reaction (4  $\mu$ L) was directly used for PCR amplification in reactions (50  $\mu$ L): End primers (0.4  $\mu$ M each, +1 and -1 synthon primers), cloned Pfu DNA polymerase buffer, dNTPs (0.2 mM each), DMSO (5 %), and cloned Pfu DNA polymerase (0.5  $\mu$ L). PCR cycle: denaturation, 98 °C (5 min), 1 cycle; extension 1, 98 °C (30 s), 45 °C (30 s), 72 °C (3 min), 5 cycles; extension 2, 98 °C (30 s), 55 °C (30 s), 72 °C (3 min), 40 cycles; clean up, 72 °C (10 min).

**note:** assembly and amplification of synthetic gene fragments could be carried out in halves for increased yield of PCR products.

### WA SAT (Q03149) synthon construction

#### Amino acid sequence reverse translated into a codon optimized sequence for E. coli

gtaacatATGGAGGATCCGTACCGTGTTTACTTGTTTCGGTGATCAAACCTGGCGACTTTGA  
 AGTTGGCTTACGTCGTCTGCTTCAAGCTAAGAATCATAGCCTCTTGTCGTCCTTCCTG  
 CAGCGTTCCTACCACGCCGTACGCCAGGAAATTCACACTTACCGCCAAGCGAACGT  
 TCTACGTTTCCACGCTTCACCTCGATCGGCGATTACTGGCGCGCCATTGCGAGTCTC  
 CCGGTAACCCGGCGATTGAATCAGTCTTAACATGTATTTATCAACTGGGATGTTTTA  
 TCAATTATTATGGGGACCTCGGACACACCTTTTCTAGCCATAGCCAGAGCCAGCTCG  
 TAGGTCTGTGTACGGGTCTGCTTAGTTGCGCAGCCGTTTCTTGCGCTAGTAACATTGG  
 CGAATTGCTTAAGCCGGCGGTTCGAAGTGGTGGTGGTGGCCCTGCGGCTGGGCCTGTG  
 CGTCTATCGCGTGCGCAAATTGTTTCGGGCAGGACCAGGCAGCGCCTCTGAGCTGGTC  
 AGCACTGGTTTCTGGCCTGTCCGAGTCGGAAGGTACCAGTCTGATCGATAAATTTAC  
 CCGGCGTAAC

#### WA-SAT upper strand oligos #1-14

| #  | sequence                                        |
|----|-------------------------------------------------|
| 1  | gtaacatATGGAGGATCCGTACCGTGTTTACTTGTTTCGGTGATCAA |
| 2  | CTGGCGACTTTGAAGTTGGCTTACGTCGTCTGCTTCAAGC        |
| 3  | TAAGAATCATAGCCTCTTGTCGTCCTTCCTGCAGCGTTCC        |
| 4  | TACCACGCCGTACGCCAGGAAATTCACACTTACCGCAA          |
| 5  | GCGAACGTTCTACGTTTCCACGCTTCACCTCGATCGGCGA        |
| 6  | TTTACTGGCGCGCCATTGCGAGTCTCCCGGTAACCCGGCG        |
| 7  | ATTGAATCAGTCTTAACATGTATTTATCAACTGGGATGTT        |
| 8  | TTATCAATTATTATGGGGACCTCGGACACACCTTTTCTAG        |
| 9  | CCATAGCCAGAGCCAGCTCGTAGGTCTGTGTACGGGTCTG        |
| 10 | CTTAGTTGCGCAGCCGTTTCTTGCGCTAGTAACATTGGCG        |
| 11 | AATTGCTTAAGCCGGCGGTTCGAAGTGGTGGTGGTGGCCCT       |
| 12 | GCGGCTGGGCCTGTGCGTCTATCGCGTGCGCAAATTGTT         |
| 13 | GGCAGGACCAGGCAGCGCCTCTGAGCTGGTCAGCACTGG         |



|    |                                          |
|----|------------------------------------------|
| 14 | TTTCTGGCCTGTCCGAGTCGGAAGGTACCAGTCTGATCGA |
|----|------------------------------------------|

### WA-SAT lower strand oligos #1-14

| #   | sequence                                  |
|-----|-------------------------------------------|
| -1  | GTTACGCCGGGTAAATTTATCGATCAGACTGGTACCTTC   |
| -2  | CGACTCGGACAGGCCAGAAACCAGTGCTGACCAGCTCAGA  |
| -3  | GGCGCTGCCTGGTCCTGCCCCAACAATTTGCGCACGCGAT  |
| -4  | AGACGCACAGGCCAGCCGCAGGGCCACCACCACCTTC     |
| -5  | GACCGCCGGCTTAAGCAATTCGCCAATGTTACTAGCGCAA  |
| -6  | GAAACGGCTGCGCAACTAAGCAGACCCGTACACAGACCTA  |
| -7  | CGAGCTGGCTCTGGCTATGGCTAGGAAAGGTGTGTCCGAG  |
| -8  | GTCCCCATAATAATTGATAAAACATCCCAGTTGATAAATA  |
| -9  | CATGTTAAGACTGATTCAATCGCCGGGTACCAGGAGACT   |
| -10 | CGCAATGGCGCGCCAGTAAATCGCCGATCGAGGTGAAGCG  |
| -11 | TGGAAACGTAGAACGTTTCGCTTGGCGGTAAGTGTGAAATT |
| -12 | TCCTGGCGTACGGCGTGGTAGGAACGCTGCAGGAAGGACG  |
| -13 | ACAAGAGGCTATGATTCTTAGCTTGAAGCAGACGACGTAA  |
| -14 | GCCAACTTCAAAGTCGCCAGTTTGATCACCGAACAAGTAA  |

## 2. PKS1 SAT (BAA18956) synthon construction

### Amino acid sequence reverse translated into a codon optimized sequence for E. coli

gtaacatATGGCCGATACAATGAGCTATTTGCTGTTTGGAGACCAGTCGCTGGATACGCA  
 TGGTTTCTTAGCTGAATTTTGTTCGTAACGGGAATCCGTCCATTTTGGCTAAGACTTTT  
 CTGGAGCAGGCCGGTCAGGCGCTGCGTGAAGAGATCGACGGTCTGGGTAAACTGGA  
 ACGCTCAAAACTGCCAACGTTCCAAACACTGCGGCAGCTCAACGAGCGCTATCACG  
 CACAGTCAATCAAACATCCGGGCATTGATAGTGCGCTGCTCTGCACCACTCAATTAG  
 CACACTACATTGATCGCACCGAAAAGGAGCCCCAGGACGCGTGTCTGCACGATCAT  
 ACGTTTTTTATGGGCCTGTGCACCGGATTGTTTCGCCGCGGCGGCCATCGCAAGCACC  
 CCATCTGTGTCTACCTTAATCCCCTCGCGGTGCAAGTAGTTCTTATGGCATTCCGCA  
 CTGGCTCCCACGTCGGCAGCTTAGCCGAACGTCTTAGCCCGCCGGTTGGCCAGAGCG  
 AACCTTGGACGCATATCCTTCCTGGGTTGAAAGAAAGTGATGCGAAGGAAGCTCTG  
 GCGAACTTTCATGAATCGAAT

### PKS1-SAT upper strand oligos #1-15

| # | sequence                                  |
|---|-------------------------------------------|
| 1 | gtaacatATGGCCGATACAATGAGCTATTT            |
| 2 | GCTGTTTGGAGACCAGTCGCTGGATACGCATGGTTTCTTA  |
| 3 | GCTGAATTTTGTTCGTAACGGGAATCCGTCCATTTTGGCTA |
| 4 | AGACTTTTCTGGAGCAGGCCGGTCAGGCGCTGCGTGAAGA  |
| 5 | GATCGACGGTCTGGGTAAACTGGAACGCTCAAAACTGCCA  |
| 6 | ACGTTCCAAACACTGCGGCAGCTCAACGAGCGCTATCACG  |
| 7 | CACAGTCAATCAAACATCCGGGCATTGATAGTGCGCTGCT  |
| 8 | CTGCACCACTCAATTAGCACACTACATTGATCGCACCGAA  |

|    |                                            |
|----|--------------------------------------------|
| 9  | AAGGAGCCCCAGGACGCGTGTCTGCACGATCATACGTTTT   |
| 10 | TTATGGGCCTGTGCACCGGATTGTTTCGCCGCGGGCCGCCAT |
| 11 | CGCAAGCACCCCATCTGTGTCTACCTTAATCCCCTCGCG    |
| 12 | GTGCAAGTAGTTCTTATGGCATTCCGCACTGGCTCCACG    |
| 13 | TCGGCAGCTTAGCCGAACGTCTTAGCCC GCCGGTTGGCCA  |
| 14 | GAGCGAACCTTGGACGCATATCCTTCCTGGGTTGAAAGAA   |
| 15 | AGTGATGCGAAGGAAGCTCTGGCGAACTTTCATGAATCGA   |

#### PKS1-SAT lower strand oligos #1-15

| #   | sequence                                  |
|-----|-------------------------------------------|
| -1  | ATTCGATTCATGAAAGTTCGCC                    |
| -2  | AGAGCTTCCTTCGCATCACTTTCTTTCAACCCAGGAAGGA  |
| -3  | TATGCGTCCAAGGTTCGCTCTGGCCAACCGGCGGGCTAAG  |
| -4  | ACGTTTCGGCTAAGCTGCCGACGTGGGAGCCAGTGCGGAAT |
| -5  | GCCATAAGAACTACTTGCACCGCGAGGGGAATTAAGGTAG  |
| -6  | ACACAGATGGGGTGCTTTCGATGGCCGCCGCGGCGAACAA  |
| -7  | TCCGGTGCACAGGCCCCATAAAAAACGTATGATCGTGCAGA |
| -8  | CACGCGTCTGGGGCTCCTTTTCGGTGCATCAATGTAGT    |
| -9  | GTGCTAATTGAGTGGTGCAGAGCAGCGCACTATCAATGCC  |
| -10 | CGGATGTTTGATTGACTGTGCGTGATAGCGCTCGTTGAGC  |
| -11 | TGCCGCAGTGTTTGGAACGTTGGCAGTTTTGAGCGTTCCA  |
| -12 | GTTTACCCAGACCGTCGATCTCTTCACGCAGCGCCTGACC  |
| -13 | GGCCTGCTCCAGAAAAGTCTTAGCCAAAATGGACGGATTC  |
| -14 | CCGTTACGACAAAATTCAGCTAAGAAACCATGCGTATCCA  |
| -15 | GCGACTGGTCTCCAAACAGCAAATAGCTCATTGTATCGGC  |

#### PKS1 SAT-C119A mutagenesis

The active site Cys within the SAT (synthon region) was mutated (C119A) using overlap extension PCR with the mutant primers, PKS1-SAT-C119A-5 / PKS1-SAT-C119A-3, and the end primers, SAT-PKS1-3 / PKS1 upper strand oligo # 1. The PCR product was digested with NdeI and NotI and inserted into pET24a to generate the SAT monodomain mutant construct, pEPKS1-SAT-C119A. The PCR product was digested with NdeI and SacII and inserted into the corresponding sites in pEPKS1-NKA to create the SAT-KS-MAT tridomain mutant construct, pEPKS1-NKA-C119A.

#### PKS1-SAT mutant oligos

| primer           | sequence                               |
|------------------|----------------------------------------|
| PKS1-SAT-C119A-5 | ACGTTTTTTTATGGGCCTGGCCACCGGATTGTTTCGCC |

|                  |                                      |
|------------------|--------------------------------------|
| PKS1-SAT-C119A-3 | GGCGAACAAATCCGGTGGCCAGGCCATAAAAAACGT |
| SAT-PKS1-3       | GTAAGCGGCCGC-GCCACTGGAACCGTGGTTTCC   |

### 3. CTB1 SAT (AAT69682) synthon construction

#### Amino acid sequence reverse translated into a codon optimized sequence for E. coli

gtaacatATGGAAGATGGCGCCCAAATGCGCGTGGTAGCCTTCGGGGACCAAACCTATG  
 ACTGCTCAGAAGCGGTGAGCCAGCTGTTGCGCGTACGTGACGATGCGATCGTGGTC  
 GATTTTTTAGAACGTGCACCGGCAGTTCTTAAAGCGGAACTGGCGCGCTTGTCCAGC  
 GAGCAGCAGGAAGAGACTCCGCGCTTTGCAACCCTGGCCGAGTTAGTCCCTCGTTAT  
 CGGGCCGGCACGCTGAATCCGGCCGTGAGTCAGGCTCTCACTTGTATTGCTCAACTG  
 GGTCTGTTTCATCCGCCAGCATTTCGAGCGGCCAAGAAGCGTATCCCACCGCCACGAT  
 TCTTGCATTACCGGCGTTTGTACCGGCGCATTGACGGCGGTTGCGGTCGGCTCCGCA  
 AGCTCAGTCACAGCTCTGGTTCCATTAGCGCTGCATACGGTGGCAGTTGCGGTACGT  
 CTGGGAGCTCGTGCTTGGGAGATTGGTAGCTGCCTCGCTGATGCCCGTCGGGGTGCG  
 AACGGGCGTTACGCATCGTGGACAAGTGCCGTGGGTGGAATTTCTCCGCAGGATCTT  
 CAGGACCGCATCTCTGCGTACACCGCCGAACAGGCGGcttgcacatccgtgccc

#### CTB1-SAT upper strand oligos #1-15

| #  | sequence                                      |
|----|-----------------------------------------------|
| 1  | gtaacatATGGAAGATGGCGCCCAAATGCGCGTGGTAGCCTTCGG |
| 2  | GGACCAAACCTATGACTGCTCAGAAGCGGTGAGCCAGCTG      |
| 3  | TTGCGCGTACGTGACGATGCGATCGTGGTCGATTTTTTAG      |
| 4  | AACGTGCACCGGCAGTTCTTAAAGCGGAACTGGCGCGCTT      |
| 5  | GTCCAGCGAGCAGCAGGAAGAGACTCCGCGCTTTGCAACC      |
| 6  | CTGGCCGAGTTAGTCCCTCGTTATCGGGCCGGCACGCTGA      |
| 7  | ATCCGGCCGTGAGTCAGGCTCTCACTTGTATTGCTCAACT      |
| 8  | GGGTCTGTTTCATCCGCCAGCATTTCGAGCGGCCAAGAAGCG    |
| 9  | TATCCCACCGCCACGATTCTTGCATTACCGGCGTTTGT        |
| 10 | CCGGCGCATTGACGGCGGTTGCGGTCGGCTCCGCAAGCTC      |
| 11 | AGTCACAGCTCTGGTTCCATTAGCGCTGCATACGGTGGCA      |
| 12 | GTTGCGGTACGTCTGGGAGCTCGTGCTTGGGAGATTGGTA      |
| 13 | GCTGCCTCGCTGATGCCCGTCGGGGTGCGAACGGGCGTTA      |
| 14 | CGCATCGTGGACAAGTGCCGTGGGTGGAATTTCTCCGCAG      |
| 15 | GATCTTCAGGACCGCATCTCTGCGTACACCGCCGAACAGG      |

#### CTB1-SAT lower strand oligos #1-15

| # | sequence                                  |
|---|-------------------------------------------|
| 1 | ggacacggatgcaagCGCCTGTTTCGGCGGTGTACGCA    |
| 2 | GAGATGCGGTCCCTGAAGATCCTGCGGAGAAATTCCACCCA |
| 3 | CGGCACTTGTCCACGATGCGTAACGCCCGTTCGCACCCCG  |
| 4 | ACGGGCATCAGCGAGGCAGCTACCAATCTCCAAGCACGA   |
| 5 | GCTCCAGACGTACCGCAACTGCCACCGTATGCAGCGCTA   |
| 6 | ATGGAACCAGAGCTGTGACTGAGCTTTCGGGAGCCGACCGC |

|    |                                           |
|----|-------------------------------------------|
| 7  | AACCGCCGTCAATGCGCCGGTACAAACGCCGGTAATGCAA  |
| 8  | GAATCGTGGGCGGTGGGATACGCTTCTTGGCCGCTCGAAT  |
| 9  | GCTGGCGGATGAACAGACCCAGTTGAGCAATACAAGTGAG  |
| 10 | AGCCTGACTCACGGCCGGATTCAGCGTGCCGGCCCCGATAA |
| 11 | CGAGGGACTAACTCGGCCAGGGTTGCAAAGCGCGGAGTCT  |
| 12 | CTTCCTGCTGCTCGCTGGACAAGCGCGCCAGTTCCGCTTT  |
| 13 | AAGAACTGCCGGTGCACGTTCTAAAAAATCGACCACGATC  |
| 14 | GCATCGTCACGTACGCGCAACAGCTGGCTCACCGCTTCTG  |
| 15 | AGCAGTCATAGGTTTGGTCCCCGAAGGCTACCACGCGCAT  |

#### 4. PKS4 SAT (CAB92399) synthon construction

Amino acid sequence reverse translated into a codon optimized sequence for E. coli

gtaacatATGGCGAGCAGCGCCGACGTGTATGTGTTTCGGCGATCAGAGCACCCCAGTAC  
TGGACAAATTACAGGCATTGGTTCGCGTGAAGGATAACGCTTTACTGACATCGTTTT  
TGGGCGAAGCCTTTTTGGCCGTTTCGCCGTGAAATCGTGTCCCTCTCGTCTCTGGAGC  
GTAAGAGTATTCCGGAAGCGGAGTCTTTAAGCCTCCTGCTTGAAGGCGTACGGCGCT  
CCGAGCCCCACGCAGCTCTGGATAGCGCGTTTGTCTGTATTTACGAAATTGGTTATT  
ACATCGACCGTTGTTGCCATTGCGCAAAGATGTTTTTGAATTAGTCGCCTGGGAG  
TTGAGGCTGCCACGGTCGCGTTCGCTGGGTATGCATGTCCGTCGCCGCGCAGAAA  
ATCTTGGGTATTCGACTCCTTCATCCTGGAGTATGATCCTGTCTAATCAACCAAGAGG  
AACTGGTGAGCGAAGCGCTGAAAGAATTCTCAAAGGAAAAA

#### PKS4-SAT upper strand oligos #1-12

| #  | sequence                                     |
|----|----------------------------------------------|
| 1  | gtaacatATGGCGAGCAGCGCCGACGTGTATGTGTTTCGGCGAT |
| 2  | CAGAGCACCCCAGTACTGGACAAATTACAGGCATTGGTTC     |
| 3  | GCGTGAAGGATAACGCTTTACTGACATCGTTTTTGGGCGA     |
| 4  | AGCCTTTTTGGCCGTTTCGCCGTGAAATCGTGTCCCTCTCG    |
| 5  | TCTCTGGAGCGTAAGAGTATTCCGGAAGCGGAGTCTTTAA     |
| 6  | GCCTCCTGCTTGAAGGCGTACGGCGCTCCGAGCCCCACGC     |
| 7  | AGCTCTGGATAGCGCGTTTGTCTGTATTTACGAAATTGGT     |
| 8  | TATTACATCGACCGTTGTTGCCATTGCGCAAAGATGTTT      |
| 9  | TTGAAATTAGTCGCCTGGGAGTTGAGGCTGCCACGGTCGC     |
| 10 | GTTCCGTCGGGTATGCATGTCCGTCGCCGCGCAGAAAAT      |
| 11 | CTTGGGTATTCGACTCCTTCATCCTGGAGTATGATCCTGT     |
| 12 | CATCTAACCAAGAGGAAGTGGTGAGCGAAGCGCTGAAAGA     |

#### PKS4-SAT lower strand oligos #1-12

| # | sequence                                 |
|---|------------------------------------------|
| 1 | TTTTTCCTTTGAGAATTCCTTCAGCGCTTCGCTCAC     |
| 2 | CAGTTCCTCTTGGTTAGATGACAGGATCATACTCCAGGAT |
| 3 | GAAGGAGTCGAATACCCAAGATTTTCTGCGCGGCGACGGA |
| 4 | CATGCATACCCAGACGGAACGCGACCGTGGCAGCCTCAAC |

|    |                                           |
|----|-------------------------------------------|
| 5  | TCCCAGGCGACTAATTTCAAAAACATCTTTTGCGCAATGG  |
| 6  | CAACAACGGTCGATGTAATAACCAATTTTCGTAAATACAGA |
| 7  | CAAACGCGCTATCCAGAGCTGCGTGGGGCTCGGAGCGCCG  |
| 8  | TACGCCTTCAAGCAGGAGGCTTAAAGACTCCGCTTCCGGA  |
| 9  | ATACTCTTACGCTCCAGAGACGAGAGGGACACGATTTAC   |
| 10 | GGCGAACGGCCAAAAAGGCTTCGCCCAAAAACGATGTCAG  |
| 11 | TAAAGCGTTATCCTTCACGCGAACCAATGCCTGTAATTTG  |
| 12 | TCCAGTACTGGGGTGCTCTGATCGCCGAACACATACACGT  |

**PKS4-SAT revised gDNA sequence**

ATGGCGTCCTCAGCAGATGTGTATGTCTTTGGCGATCAGAGCACACCCGTTCTTGAT  
AAATTGCAAGCCCTTGTGCGCGTGAAAGATAATGCGCTTTTACTTC**T**TTTCTTGGC  
GAGGCGTTTTTGGCTGTGCGAAGAGAGATTGTTTCGCTCTCGTCTTTAGAGAGAAAA  
TCGATTCCCGAGGCTGAGAGCTTGAGTTTGCTTTTGGAGGGCGTTCGGAGGAGTGAG  
CCTCATGCGGCGCTGGATAGTGCTTTTGTGTGCATTTATGAGATTGGATACTACATTG  
*Agtaagtctgatgaaacgagcaagttct***A**ggtttgctgatgagattcaagCTATTTGGCTCGTTCGGATAAGCA  
ACACCCGCCGGCAGCTCCATCTTTGCTACTCGGTATCTGCACTGGTAGCATTGCAGC  
CGCTGCTGTCA**G**CTGCGCGAAGGATGTTTTCGAGATCTCGAGACTGGGCGTTGAAG  
CTGCGACAGTTGCCTTCCGACTTGGAATGCACGTTTCGCAGAAGAGCCGAGAACCTTG  
GGTACTCGACACCTTCGAGCTGGTCCATGATTCTGTCTTCGAATCAGGAGGAGCTTG  
TTTCAGAAGCATTAAAAGAATTCTCCAAGGAAAAA*gtaagttcgagagctttggtattcccaatttgagta*  
*atgctcattttgtttcag*AATCTTACATACAGTTCGCGTCCCTACATCAGCGCCACTGGTCCTGG  
TTTCACAACAATCAGCGGTCCCCCATCTATCCTCGAGTCAGTGAAGTCTTGCGATAC  
TTTCTCTGGAAAGAGGTTATATCCAGCTCCCATCTATGGTCCCTACCATAACTCTTCA  
TCATACTCCGAATCCAGCCTGGAACATGGCCTTGCATCAATCCTTGAAGACGTTGGG  
TTCCTAGAGAACGAGATGCTCATTCCCATCATCTCCTGCGCCTCCGGATCTCGCTTA  
GACCAGTTGTCTTTCGGGAACCTCCTCAAGAACGTTTTGAGCAGCGCTCTGTCTCAG  
CAAATTCGTATGGATCTCGTCACCGACGCTCTAGTCGAAACCGTTTCTGGCACTGAA  
GCTACCTTGATAACCGGTCAATGCCCAAACAACCTGTTTGCAGTCTCGCTGATTGGTTG  
GCTAAGAGAGGAGCTACAACCTCGCATTGGGCCAACCTTGGAGAGCCTGACCAAAGA  
CCGAGCAGAACCCAATCTTGCTCCTGGCGAT . . .

**PKS4 revised gDNA sequence.** Capitol letters represent the revised exon sequence as predicted by FGENESH ([www.softberry.com](http://www.softberry.com)). Bold letters represent differences found in exons 1 and 2 compared to the CAB92399 sequence, which led to this alternative splicing pattern: first mutation C→**T**, silent Ser codon; C→**A**, noncoding mutation; and **G** additional base pair found in the revised sequence.

### PKS4-SAT revised amino acid sequence

CIYEIGYYID-“YLARSDKQHPPAAPSLLL(GICTG)SIAAAAVS”-CAKDVFEISR

### Amino acid sequence reverse translated into a codon optimized sequence for E. coli

“TACCTGGCTCGTTCCGACAAACAGCATCCACCGGCAGCGCCTTCATTGCTGTTAGG  
TATTGTACTGGCTCGATCGCCGCCGCGGCAGTCAGC”

### PKS4-SAT revised upper and lower strand oligos #1-2

| #  | sequence                                                        |
|----|-----------------------------------------------------------------|
| 1  | GAAATTGGTTATTACATCGAC-TACCTGGCTCGTTCCGACAAACAGCATCCACCGGCAG     |
| 2  | CGCCTTCATTGCTGTTAGGTATTGTACTGGCTCGATCGC                         |
| -1 | ATTTCAAAAACATCTTTTGCGCA-<br>GCTGACTGCCGCGGCGGCATCGAGCCAGTACAAAT |
| -2 | ACCTAACAGCAATGAAGGCGCTGCCGGTGGATGCTGTTTG                        |

The revised PKS4-SAT sequence was constructed using pEPKS4-SAT as the template in a 3-part overlap extension PCR. The 5'-part was amplified using the first forward synthon upper strand oligo #1 and PKS4-3-n. The central portion was constructed from the revised synthetic fragment. The 3'-part was amplified using PKS4-5-n and SAT-PKS4-3 primers. The three fragments were fused and amplified using the end primers prior to insertion into pET24a to generate the revised construct, pEPKS4-SAT<sub>n</sub>.

### PKS4-SAT revised oligos for overlap extension PCR

| primer   | sequence                |
|----------|-------------------------|
| PKS4-3-n | GTCGATGTAATAACCAATTTTCG |
| PKS4-5-n | TGCGCAAAGATGTTTTT       |
